1 **Urinary bisphenol A exposure in relation to liver function abnormalities among**  
2 **U.S. adults: results from the National Health and Nutrition Examination Survey,**  
3 **2003-2016**

4 Tiantian Zhang<sup>1#</sup> Guang Huang<sup>2#</sup> Tongshuai Wang<sup>3</sup> Jie Chen<sup>4</sup> Xiangyu Zhou<sup>5</sup>  
5 Wenming Shi<sup>1,6\*</sup>

6

7 1. School of Public Health, Fudan University, Shanghai, 200032, China.

8 2. School of Public Health, Bengbu Medical College, Bengbu, Anhui, China.

9 3. Hongqiao International Institute of Medicine, Shanghai Tongren Hospital, School  
10 of Medicine of Shanghai Jiaotong University, Shanghai 20050, China.

11 4. Department of Big Data in Health Science School of Public Health, Zhejiang  
12 University School of Medicine, Hangzhou, Zhejiang, China.

13 5. Obstetrics and Gynecology Hospital of Fudan University, State Key Lab of Genetic  
14 Engineering, Fudan University Shanghai Medical College, Shanghai 200011, China.

15 6. School of Public Health, Li Ka Shing Faculty of Medicine, The University of Hong  
16 Kong, Hong Kong Special Administrative Region, Hong Kong, China.

17

18 **# These two authors contributed equally to this work.**

19

20 **\*Correspondence:**

21 Wenming Shi, PhD

22 **E-mail:** wmshi16@fudan.edu.cn

23 **Address:** No. 130, Dong'an Road, Xuhui District, Shanghai 200032, China.

24

25 **Conflicts of interests**

26 None declared.

27 **Summary**

28 **Background:** Bisphenol A (BPA) is an endocrine-disrupting chemical that has been  
29 linked with various health outcomes. However, few studies using nationally  
30 representative data have assessed the association between BPA exposure with liver  
31 function. In addition, whether behavior characteristics of smoking and alcohol use  
32 modify such association has been underexplored.

33 **Methods:** Using data from seven cycles of the National Health and Nutrition  
34 Examination Surveys (NHANES) among 11,750 adults from 2003 to 2016, we  
35 investigated the relationship between urinary BPA with liver function indicators. BPA  
36 concentration in urine was measured by using high performance liquid  
37 chromatography with atmospheric pressure chemical ionization–mass spectrometry.  
38 We estimated BPA concentration after controlling for creatinine and normalized the  
39 asymmetrical distribution using natural logarithmic transformation ( $\ln\text{-BPA/Cr}$ ). Eight  
40 liver function indicators in serum were examined. Multivariate linear regression  
41 models were performed to explore the association between urinary BPA with changes  
42 in liver indicators. Stratified analyses examined whether these associations varied by  
43 sex, age, smoking, or drinking.

44 **Findings:** Of the 11,750 participants (49.5% men), the mean age was 43.9 years. Per  
45 unit increment in  $\ln\text{-BPA/Cr}$  was positively related to alkaline phosphatase (ALP) and  
46 total bilirubin (TBIL), while inversely with albumin (ALB). In quartile analysis, the  
47 highest BPA exposure was associated with higher aspartate aminotransferase (AST),  
48 ALP, and TBIL, while with decreased ALB (all  $P_{\text{trend}} < 0.01$ ). These associations for  
49 specific liver indicators (i.e., ALT, AST, Gamma-glutamyl transferase [GGT], and

50 TBIL) were stronger in smokers and alcohol drinkers. Moreover, we found that BPA  
51 exposure with higher ALP in older adults ( $\geq 60$  years) but no sex difference.

52 **Interpretation:** This nationally representative study suggested that urinary BPA was  
53 associated with elevated AST, ALP, TBIL, and inversely with ALB among U.S. adults.  
54 The associations were more evident in smokers and drinkers but no sex difference.  
55 Better understanding of the mechanisms is needed for improving liver and planetary  
56 health.

57 **Funding:** National Natural Science Foundation of China.

58

59 **Key words:** Bisphenol A; Liver injury; Liver enzymes; NHANES; Total bilirubin

60

61

62

63

64

65

66

67

68

69

70

71 **Abbreviations**

- 72 BPA: Bisphenol A
- 73 NHANES: National Health and Nutrition Examination Survey
- 74 ALT: Alanine aminotransferase
- 75 AST: Aspartate aminotransferase
- 76 GGT: Gamma glutamyl transferase
- 77 ALP: Alkaline phosphotase
- 78 TBIL: Total bilirubin
- 79 ALB: Albumin
- 80 TP: Total protein
- 81 95% CI: 95% confidence interval
- 82 CVD: Cardiovascular disease
- 83 PIR: Poverty income ratio
- 84
- 85
- 86
- 87
- 88
- 89
- 90
- 91
- 92
- 93 **Introduction**

94 Over the past decades, liver diseases have become one of the leading causes of  
95 mortality and illness globally (1). Studies have reported that more than 800 million  
96 people suffer from chronic liver disease worldwide, with two million deaths per year  
97 (1,2). People with advanced chronic liver disease have high rates of hospital  
98 admission and generally need more healthcare services that have a substantial  
99 economic cost (3). Therefore, it is imperative to work together to understand the risk  
100 factors of liver health to better cope with the rising tide of liver disease. Liver function  
101 testing (LFT) is one of the commonly used clinical assessments for the diagnosis of  
102 liver injury (4). In recent years, increasing evidence has suggested that many  
103 chemicals and environmental pollutants can lead to liver dysfunction and increase  
104 liver disease risk (5,6).

105

106 Bisphenol A (BPA) is a phenolic compound widely used in the manufacture of  
107 polycarbonate plastics and epoxy resin. With the rapidly increasing production of  
108 BPA, it is reported that the production is projected to be about 10.6 million tons in  
109 2022 (7). Besides the environmental substrates, BPA can also be found in food and  
110 beverage containers, bottles and cans, tap water pipes, toys, electronic devices, and  
111 even in the composites in dental restorations (8). Thus, people are continuously  
112 exposed to BPA through ingestion, inhalation, dermal contact, and other pathways (9).  
113 A growing number of studies indicate that BPA is an endocrine-disrupting chemical,  
114 which is related to multiple adverse health outcomes including cardiovascular  
115 diseases (CVD) (10), diabetes (11), kidney disease (12), and reproductive health

116 (13,14). Animal experiments showed that BPA-treated rats had elevated levels of  
117 alanine aminotransferase (ALT) and aspartate aminotransferase (AST) as well as  
118 marked defects in liver morphology (15). A panel study conducted in Korea presented  
119 that urinary BPA was associated with ALT, AST, and Gamma glutamyl transferase  
120 (GGT) in the elderly (16). However, previous studies are performed with several  
121 limitations of analyzing limited liver function indicators, or in a special population  
122 (16,17), the knowledge about BPA exposure on other liver function parameters such  
123 as total bilirubin (TBIL), albumin (ALB), and total protein (TP) is under-examined.  
124 Evidence has suggested that TBIL is a critical indicator for the diagnosis of liver  
125 disease, and serum TP and ALB levels can indicate chronic liver injury and  
126 hepatocyte reserve function (4,18). Therefore, using a general population study to  
127 comprehensively evaluate the impacts of BPA on liver function indicators is merited.  
128 In addition, considering smoking and alcohol consumption are prevalent behavior  
129 factors around the world, however, whether these behavior characteristics modified  
130 the association between BPA and liver function remains unclear.

131

132 Given the high-volume industrial production of BPA worldwide, identifying the  
133 effects of BPA exposure on liver function is critical for improving liver and planetary  
134 health. Using a nationally population-representative study in the United States, we  
135 aimed to investigate the association between urinary BPA with multiple liver function  
136 indicators among U.S. adults. Moreover, we evaluated whether the associations varied  
137 by sex, age, smoking, and alcohol drinking.

138

## 139 **Methods**

### 140 **Study design and participants**

141 The National Health and Nutrition Examination Survey (NHANES) is an ongoing  
142 national-representative survey of the U.S. non-institutionalized population. Detailed  
143 study design and study population have been described at [https://www.cdc.gov/nchs/  
144 nhanes/index.html](https://www.cdc.gov/nchs/nhanes/index.html). Briefly, a stratified, multistage probability sampling was applied  
145 to collect health and nutritional status of adults and children in the U.S. annually by  
146 the National Center for Health Statistics (NCHS) ([https://wwwn.cdc.gov/nchs/nhanes/  
147 default.aspx](https://wwwn.cdc.gov/nchs/nhanes/default.aspx)). NCHS-trained professionals conducted interviews in participants'  
148 homes, whereas extensive physical measurements, including blood and urine  
149 collection, were conducted at mobile exam centers.

150

151 In this study, we combined data from seven cycles from NHANES (2003-2004,  
152 2005-2006, 2007-2008, 2009-2010, 2011-2012, 2013-2014, and 2015-2016) with  
153 available individual BPA measurement. Of the 71,058 participants in total, we  
154 excluded individuals aged less than 18 years old at the time of participation  
155 (n=29,151), with missing data of BPA (n=26,480), without urinary creatinine and  
156 health outcomes (n=3,677), resulting in 11,750 participants included in the final  
157 analyses. The NHANES study was approved by the ethical review committee of the  
158 NCHS. All participants provided written informed consent. Figure S1 shows the  
159 selection process of the participants. This study followed the Strengthening the

160 Reporting of Observational Studies in Epidemiology (STROBE) reporting guidelines

161 (19).

162

### 163 **Measurement of urinary BPA**

164 As part of NHANES ongoing biomonitoring program, spot urine samples were

165 collected from one-third random subsample of the participants. The urine samples

166 were frozen and stored on dry ice for shipping to the U.S. National Center for

167 Environmental Health before testing. Urinary BPA concentration was measured by

168 using solid phase extraction coupled with high performance liquid chromatography

169 with atmospheric pressure chemical ionization–mass spectrometry (HPLC/MS-MS).

170 To control for dilution, the creatinine-corrected BPA concentration (BPA/Cr, ng/mg)

171 was applied in the current study. The limit of detection (LOD) of urinary BPA values

172 was in the level of 0.4 ng/ml for each cycle in NHANES. To reduce the bias from the

173 relatively high rate of individuals (around 10%) with BPA concentrations below the

174 LOD, we excluded them from our analysis.

175

### 176 **Liver function tests**

177 ALT and AST are liver enzyme parameters released after hepatocytes necrosis or liver

178 cell membrane injury, they are elevated during acute liver damage (4). ALT/AST is

179 the ratio of ALT and AST concentration, which is a sensitivity indicator of liver

180 injury (20). ALP is a marker of cholestasis, and GGT is used in clinical practice to

181 ascertain the liver source of an elevated ALP (21). Serum TBIL level is affected by



182 the balance between bilirubin production and clearance, and hepatocytes are the main  
183 site of bilirubin clearance (22). Elevated serum bilirubin levels usually suggest liver  
184 damage or obstruction of the bile duct. Decreased ALB or TP mainly implies limited  
185 liver synthesis (4).

186

187 In this study, serum liver function parameters were measured by different methods  
188 using Beckman Coulter technique. During 2003-2006, serum liver indicators were  
189 tested on a Beckman Synchron LX20 using an enzymatic rate method. In 2007-2016,  
190 the levels of serum liver function indicators were measured on a Beckman Unicel  
191 DxC800 Synchron using a kinetic rate method (23). The ALT/AST (DeRitis) ratio  
192 was calculated accordingly.

193

#### 194 **Covariates**

195 We collected the covariates or potential confounding that are linked to liver function  
196 or urinary BPA according to common sense or previous findings(16,17). The  
197 covariates included demographic characteristics of age, sex, body mass index (BMI),  
198 educational level (less than high school, high school, some college and more),  
199 race/ethnicity, poverty income ratio (PIR), smoking status (current, former, never),  
200 alcohol drinking (yes or no), and main chronic conditions including hypertension,  
201 diabetes, and cardiovascular disease (CVD), which were obtained using validated  
202 questionnaire during the family interview. Race/ ethnicity was categorized as  
203 “Mexican American”, “other Hispanic”, “non-Hispanic white”, “non-Hispanic black”,

204 and “other race”. PIR is a measurement of socioeconomic status and represents the  
205 ratio of household income to the poverty threshold after accounting for inflation and  
206 family size (24). Hypertension was defined as systolic blood pressure (SBP)  $\geq 140$   
207 mmHg and/or diastolic blood pressure (DBP)  $\geq 90$  mmHg, and/or self-reported  
208 doctor-diagnosed hypertension, and/ or taking antihypertensive medicine. Diabetes  
209 was defined as measured fasting blood glucose  $\geq 7.0$  mmol/l (or oral glucose  
210 tolerance test, OGTT  $\geq 11.1$  mmol/l), and/ or glycohemoglobin (HbA1c)  $\geq 6.5\%$ , with  
211 self-reported doctor-diagnosed diabetes, and/ or taking anti-diabetes medicine or  
212 insulin. CVD was assessed if a participant had one of the following diagnosed  
213 diseases: congestive heart failure, coronary heart disease, heart attack (or myocardial  
214 infarction), angina pectoris, and stroke.

215

## 216 **Statistical analyses**

217 Following the CDC guideline (<https://wwwn.cdc.gov/nchs/nhanes/tutorials/default.aspx>), all analyses were performed using appropriate weights as recommended by  
218 NCHS, to generate accurate estimates nationally, adjusting for the oversampling of  
219 minority groups in the NHANES. Descriptive characteristics were summarized for the  
220 total participants included and participants in each cycle from 2003 to 2016.  
221 Continuous variable was presented as median (interquartile range, IQR), and  
222 categorized variable was expressed as absolute value and percentages. Considering  
223 the missing value for the covariates (ranging from 0.12% for educational level to  
224 12.7% for alcohol drinking), multiple imputation (MI) procedure was performed to  
225

226 deal with the missing in our analysis. The trend of urinary exposure concentrations of  
227 BPA across seven cycles from 2003 to 2016 was summarized. Moreover, we  
228 evaluated creatinine-corrected BPA distributions (BPA/Cr, ng/mg) by participants'  
229 characteristics.

230

231 The creatinine-corrected BPA was a natural logarithm transformed to normalize its  
232 distribution. Survey-weighted linear regression models were conducted to calculate  
233 the estimates of  $\beta$  and 95% confidence intervals (95% CI) on the association of  
234 urinary BPA with liver function indicators. We fitted three regression models: 1)  
235 model 1: crude model; model 2 adjusting for age, sex, BMI, educational level,  
236 race/ethnicity, PIR, smoking status, and alcohol drinking; 3) further adjusting for  
237 hypertension, diabetes, and CVD based on model 2. Furthermore, we divided the  
238 ln-transformed BPA concentrations (ln-BPA/Cr) into four quartiles to further evaluate  
239 the associations by using the fully adjusted model, with reference to the lowest  
240 quartile. Linear trend tests were conducted by applying quartiles as a continuous  
241 variable in the model. To explore the exposure-response relationship between urinary  
242 BPA with liver function indicators, restricted cubic spline (RCS) analysis was  
243 performed.

244

245 To examine the potential effect modifiers, we conducted several stratified analyses by  
246 the following variables: sex (male or female), age ( $\geq 60$  years or  $< 60$  years) ,  
247 smoking exposure (yes or no), and alcohol drinking (yes or no). Differences between

248 strata was examined by z-test, the formula was expressed as below:

$$249 \quad z = \frac{\beta_1 - \beta_2}{\sqrt{SE_1^2 + SE_2^2}}$$

250 Where  $\beta_1$  and  $\beta_2$  were the effect estimates for each subgroup,  $SE_1$  and  $SE_2$  were their  
251 standard errors, respectively (25).

252

253 All statistical analyses were performed by using SAS software version 9.4 (SAS

254 Institute Inc, Cary, NC). Two-tailed  $P$ -value  $< 0.05$  was considered statistical

255 significant.

256

## 257 **Results**

258 The survey-weighted, demographic characteristics and liver function indicators of the

259 participants were presented in Table 1. Of the 11,750 participants (49.5% men), the

260 median age was 43.9 (IQR: 30.4 to 57.9) years. Most of the participants were

261 non-Hispanic white (67.24%), with an educational level at some college and more,

262 and nearly half had smoke exposure (Table 1). The median creatinine concentration

263 was 11.70 mg/l during the overall period (Table 1), ranging from 10.7 mg/l during

264 2011-2012 to 12.56 mg/l during 2005-2006 (Table S1). The trend of BPA exposure

265 concentrations in urine among the participants from 2003 to 2016 was presented in

266 Figure 1. Overall, the urinary concentrations of BPA decreased over time except for

267 an increment in two cycles (2005-2006 and 2009-2010) among the participants.

268 Moreover, in the univariate analysis, we found a higher level of creatinine-corrected

269 BPA in women and non-Hispanic White (Table S2). Table S3 presents the distribution

270 of eight liver function indicators in serum among the participants included in each  
271 cycle. The median level of each liver indicator was similar during seven cycles in the  
272 NHANES (Table S3).

273

274 Table 2 shows the association of urinary BPA exposure with changes in liver function  
275 indicators among the participants. After controlling for confounders, we found that  
276 urinary BPA was positively related to elevated levels of ALP and TBIL, while  
277 inversely with ALB (Model 2). After further adjusting for hypertension, diabetes, and  
278 CVD in Model 3, similar associations were observed for BPA with ALP (adjusted  $\beta$ =  
279 0.729, 95% CI: 0.070 to 1.389), TBIL ( $\beta$ =0.014, 95% CI: 0.005 to 0.023), and ALB  
280 ( $\beta$ = -0.011, 95% CI: -0.020 to -0.003), respectively (Table 2).

281

282 Figure 2 presents the adjusted associations between urinary BPA with liver function  
283 indicators stratified by  $\ln(\text{BPA/Cr})$  quartiles. Compared with the lowest quartile  
284 (reference), the highest quartile BPA exposure was associated with AST ( $\beta$ =1.18, 95%  
285 CI: 0.28 to 2.08), ALP ( $\beta$ = 2.05, 0.74 to 3.37), TBIL ( $\beta$ =0.04, 0.02 to 0.07), and  
286 inversely with ALB ( $\beta$ =-0.03, -0.05 to -0.01). Trend analysis gave a significant  
287 association between higher BPA exposure with liver function indicators except for TP  
288 (Figure 2). The RCS plot revealed that an exposure-response relationship between  
289  $\ln(\text{BPA/Cr})$  with an increment of ALP. Higher  $\ln(\text{BPA/Cr})$  was positively associated  
290 with ALT/AST. Moreover, we observed a decrement of TBIL related to  $\ln(\text{BPA/Cr})$  in  
291 the RCS model (Figure S2).

292

293 Stratified analyses showed that the highest quartile of urinary BPA was positively  
294 related to a higher level of serum ALT, AST, ALT/AST, GGT, and ALP in smokers,  
295 with statistical differences for ALT, ALT/AST, and GGT by smoking (z-test  $P < 0.05$ )  
296 (Figure 3). However, no difference was observed for TBIL and ALB by smoking  
297 (Figure 3). When stratified by alcohol drinking, a statistically higher level of ALT,  
298 AST, and GGT was found in drinkers after BPA exposure. However, there was no  
299 difference for other liver function indicators (z-test  $P > 0.05$ ) (Figure 3). Figure S3  
300 displays the associations by sex. Higher BPA exposure was related to elevated AST  
301 and TBIL in both men and women (Figure S3). Moreover, higher BPA exposure was  
302 positively associated with ALT and ALP in men, but with no sex difference (Figure  
303 S3). In the stratification by age, the association between BPA exposure with ALP was  
304 stronger in participants aged 60 years and older (Figure S4).

305

## 306 **Discussion**

307 Using a nationally population-representative sample from NHANES, our study  
308 explored the association between urinary BPA with eight liver function indicators  
309 among U.S. adults. The findings demonstrated that higher BPA exposure was related  
310 to elevated AST, ALP, and TBIL, while inversely with ALB. An exposure-response  
311 relationship was observed for urinary BPA with ALP and TBIL. The association for  
312 specific liver parameters (i.e., ALT, AST, GGT, or TBIL) was stronger in smokers or  
313 alcohol drinkers. Moreover, we found that individuals aged 60 years and older had a

314 higher level of ALP after exposure to BPA.

315

316 The mean concentrations of urinary BPA in the present study ranged from 2.39 ng/ml  
317 to 5.57 ng/ml from 2003 to 2016, which was higher than that in Korea (mean 0.58  
318 ng/ml) (16) and Canada (mean 1.16 ng/ml) (26). The major source of BPA is the  
319 production of polycarbonate (PC) plastics and epoxy resins, including food contact  
320 materials, protective linings for beverages and canned foods (27). According to a  
321 previous study from NHANES, the daily intake level of BPA was estimated to be  
322 49.1-59.0 ng/kg/day for men and 36.2-46.5 ng/kg/day for women, respectively (28).  
323 To our knowledge, limited population-representative studies have explored the  
324 impacts of urinary BPA exposure on liver function indicators. Consistent with a  
325 previous study among U.S. adults, higher BPA concentration was associated with an  
326 elevated level of liver enzymes including GGT and ALP (17). A panel study  
327 conducted in Korea showed that higher BPA exposure was positively related to  
328 elevated AST, ALT, and GGT in the elderly, in line with our findings (16). Another  
329 study performed in Korean adults revealed that urinary BPA increased the prevalence  
330 of nonalcoholic fatty liver disease (NAFLD) and abnormal activity of ALT, AST, and  
331 GGT (29). Nevertheless, previous studies on these associations were based on limited  
332 liver function indicators. In the current study, we contributed to comprehensively  
333 assess the effects of urinary BPA on multiple liver indicators in a U.S. general  
334 population, not only including liver enzymes but also TBIL, ALB, and TP. In addition,  
335 we revealed the trend of urinary BPA concentrations across 14 years in seven cycles.

336 Our findings added the knowledge that higher BPA was related to elevated levels of  
337 AST, ALP, and TBIL, while inversely with ALB among U.S. adults.

338

339 The potential mechanisms of BPA exposure with abnormal liver function remain  
340 unclear. There are several possible explanations. One explanation is the direct toxicity  
341 of BPA to the liver. The liver plays an important role in metabolizing and detoxicating  
342 harmful chemicals (30), and these chemicals including BPA can accumulate in the  
343 liver and increase the vulnerability of liver dysfunction (16). Moreover, animal  
344 experiments in mice showed that low BPA dose could influence de novo fatty acid  
345 synthesis through increased expression of lipogenic genes, thus contributing to  
346 hepatic steatosis (31). Studies also demonstrated that oral BPA intake could induce  
347 oxidative stress in mice hepatocytes causing hepatocyte damage (32). Additionally,  
348 BPA exposure can result in the differential expression of genes related to lipid  
349 metabolism and adipogenesis and increasing 3T3-L1 adipocyte differentiation, which  
350 disturbs liver function (33,34).

351

352 In this study, we contributed to revealing the association of urinary BPA with specific  
353 liver function indicators (i.e., ALT, AST, and GGT) was stronger in smokers and  
354 alcohol drinkers in the U.S. A previous population-based study (35) showed that  
355 smoking was related to a higher level of serum ALT and ALP, similar with our  
356 findings. It is noted that tobacco smoke is a risk factor for liver disease, chemical  
357 compounds in tobacco have cytotoxic potential which increases necroinflammation



358 and liver fibrosis. Moreover, smoking can increase the production of  
359 pro-inflammatory cytokines involved in liver cell injury (36). Regarding alcohol  
360 drinking, both epidemiological and toxicologic studies showed that alcohol  
361 consumption induces liver damage and leads to liver diseases through multiple  
362 pathways (37,38). Compared with other liver enzymes, serum GGT is involved in  
363 glutathione metabolism and is a well-established and more sensitive indicator for  
364 heavy alcohol drinking (39). In this study, we observed a higher GGT in drinkers,  
365 which might suggest a synergistic effect between BPA exposure with alcohol  
366 consumption. In addition, we found a higher ALP in participants aged 60 years and  
367 older with BPA exposure. Evidence has indicated that aging is related to significant  
368 loss of hepatic volume and blood flow, structural changes in liver cells, accumulation  
369 of aging pigments at the cytoplasm (40,41). However, there was no sex difference for  
370 BPA exposure with liver function indicators. Future studies in other populations are  
371 warranted to examine our findings.

372

373 Our study has several strengths. First, this was one of the few national-scale studies to  
374 evaluate the impacts of urinary BPA on a series of liver function parameters. The  
375 findings provide epidemiological evidence and insights for the prevention of liver  
376 injury. Second, based on a large population-representative sample from NHANES, we  
377 included seven cycles across 14 years, and the data revealed the trend of BPA  
378 exposure concentration in urine among the U.S. general population. Third, we built  
379 upon the knowledge to assess liver function indicators comprehensively rather than

380 self-reported history of liver disease to reduce reporting bias. Last, the stratified  
381 analysis showed a stronger association with BPA exposure in smokers and alcohol  
382 drinkers, which highlighted that interventions are merited to protecting liver health for  
383 those vulnerable populations.

384

385 Several limitations should be acknowledged. First, since NHANES is a  
386 cross-sectional study, the causal relationship between urinary BPA with liver function  
387 indicators cannot be established. Second, considering the test of spot urine BPA only  
388 reflects recent BPA exposure, our study has the limitation of assessing the long-term  
389 effects of BPA. Moreover, some liver enzymes have short-term within-person  
390 variability (42) and one-time measurement may be not sufficient to identify the early  
391 stages of reversible liver damage (43). Third, our study used a representative U.S.  
392 population, additional studies with other populations may be necessary to generalize  
393 our findings. Last, although we collected much individual information in this study,  
394 the unobserved or residual confounding is inevitable due to the observational design.

395

## 396 **Conclusions**

397 Using a nationally population-representative study, our findings identify the  
398 associations between urinary BPA exposure with multiple liver function indicators  
399 among U.S. adults. Higher BPA exposure was positively associated with AST, ALP,  
400 and TBIL, while inversely with ALB. The association for specific liver function  
401 indicators (i.e., ALT, AST, GGT, and TBIL) was stronger in smokers or alcohol

402 drinkers. Our study provides important implications for policymakers to implement  
403 interventions to improve liver and planetary health.

404

405

406

#### 407 **Author contributions**

408 **Tiantian Zhang:** Investigation, Writing Writing-original draft, Obtaining funding.

409 **Guang Huang:** Methodology, Software, Writing-review & editing. **Tongshuai Wang:**

410 Writing review & editing. **Jie Chen:** Writing review & editing. **Xiangyu Zhou:**

411 Writing review & editing. **Wenming Shi:** Investigation, Methodology, Acquisition,

412 analysis, and interpretation of data, Writing review & editing, Supervision. All authors

413 confirmed that they had full access to the study and accept responsibility to submit for

414 publication.

415

#### 416 **Conflict of interests**

417 The authors declare that they have no competing interests.

418

#### 419 **Funding**

420 This work was supported by the National Natural Science Foundation of China

421 (72204048).

422

423

424

#### 425 **References**

- 426 1. Paik JM, Golabi P, Younossi Y, Mishra A, Younossi ZM 2020 Changes in the Global Burden of  
427 Chronic Liver Diseases From 2012 to 2017: The Growing Impact of NAFLD. *Hepatology*  
428 **72**(5):1605-1616.
- 429 2. Marcellin P, Kutala BK 2018 Liver diseases: A major, neglected global public health problem  
430 requiring urgent actions and large-scale screening. *Liver Int* **38 Suppl 1**:2-6.
- 431 3. Asrani SK, Kouznetsova M, Ogola G, Taylor T, Masica A, Pope B, Trotter J, Kamath P, Kanwal F  
432 2018 Increasing Health Care Burden of Chronic Liver Disease Compared With Other Chronic Diseases,  
433 2004-2013. *Gastroenterology* **155**(3):719-729.e4.
- 434 4. Newsome PN, Cramb R, Davison SM, Dillon JF, Foulerton M, Godfrey EM, Hall R, Harrower U,  
435 Hudson M, Langford A, Mackie A, Mitchell-Thain R, Sennett K, Sheron NC, Verne J, Walmsley M,  
436 Yeoman A 2018 Guidelines on the management of abnormal liver blood tests. *Gut* **67**(1):6-19.
- 437 5. Li W, Li X, Su J, Chen H, Zhao P, Qian H, Gao X, Ye Q, Zhang G, Li X 2023 Associations of blood  
438 metals with liver function: Analysis of NHANES from 2011 to 2018. *Chemosphere* **317**:137854.
- 439 6. Zhao Y, Yan Y, Xie L, Wang L, He Y, Wan X, Xue Q 2020 Long-term environmental exposure to  
440 microcystins increases the risk of nonalcoholic fatty liver disease in humans: A combined fisher-based  
441 investigation and murine model study. *Environ Int* **138**:105648.
- 442 7. Duenas-Moreno J, Mora A, Cervantes-Aviles P, Mahlkecht J 2022 Groundwater contamination  
443 pathways of phthalates and bisphenol A: origin, characteristics, transport, and fate - A review. *Environ*  
444 *Int* **170**:107550.
- 445 8. Vandenberg LN, Hauser R, Marcus M, Olea N, Welshons WV 2007 Human exposure to bisphenol  
446 A (BPA). *Reprod Toxicol* **24**(2):139-77.
- 447 9. Ma Y, Liu H, Wu J, Yuan L, Wang Y, Du X, Wang R, Marwa PW, Petlulu P, Chen X, Zhang H 2019  
448 The adverse health effects of bisphenol A and related toxicity mechanisms. *Environ Res* **176**:108575.
- 449 10. Moon S, Yu SH, Lee CB, Park YJ, Yoo HJ, Kim DS 2021 Effects of bisphenol A on cardiovascular  
450 disease: An epidemiological study using National Health and Nutrition Examination Survey 2003-2016  
451 and meta-analysis. *Sci Total Environ* **763**:142941.
- 452 11. Aekplakorn W, Chailurkit LO, Ongphiphadhanakul B 2015 Relationship of serum bisphenol A with  
453 diabetes in the Thai population, National Health Examination Survey IV, 2009. *J Diabetes* **7**(2):240-9.
- 454 12. Nie H, Wang F, Zhang Y, Zhang S, Han X, Zhang X, Guo H, He M 2021 Associations of serum  
455 bisphenol A levels with incident chronic kidney disease risk. *Sci Total Environ* **771**:145401.
- 456 13. Caporossi L, Vigano P, Paci E, Capanna S, Alteri A, Campo G, Pignini D, De Rosa M, Tranfo G,  
457 Papaleo B 2021 Female Reproductive Health and Exposure to Phthalates and Bisphenol A: A Cross  
458 Sectional Study. *Toxics* **9**(11).
- 459 14. Adoamnei E, Mendiola J, Vela-Soria F, Fernandez MF, Olea N, Jorgensen N, Swan SH,

- 460 Torres-Cantero AM 2018 Urinary bisphenol A concentrations are associated with reproductive  
461 parameters in young men. *Environ Res* **161**:122-128.
- 462 15. Korkmaz A, Ahabab MA, Kolankaya D, Barlas N 2010 Influence of vitamin C on bisphenol A,  
463 nonylphenol and octylphenol induced oxidative damages in liver of male rats. *Food Chem Toxicol*  
464 **48**(10):2865-71.
- 465 16. Lee MR, Park H, Bae S, Lim YH, Kim JH, Cho SH, Hong YC 2014 Urinary bisphenol A  
466 concentrations are associated with abnormal liver function in the elderly: a repeated panel study. *J*  
467 *Epidemiol Community Health* **68**(4):312-7.
- 468 17. Lang IA, Galloway TS, Scarlett A, Henley WE, Depledge M, Wallace RB, Melzer D 2008  
469 Association of urinary bisphenol A concentration with medical disorders and laboratory abnormalities  
470 in adults. *JAMA* **300**(11):1303-10.
- 471 18. Tien TT, Adachi Y, Taketani S 2022 A Fluorescence-Based Quantitative Analysis for Total  
472 Bilirubin in Blood and Urine. *Lab Med* **53**(1):6-11.
- 473 19. Vandenberg JP, von Elm E, Altman DG, Gotzsche PC, Mulrow CD, Pocock SJ, Poole C,  
474 Schlesselman JJ, Egger M 2007 Strengthening the Reporting of Observational Studies in Epidemiology  
475 (STROBE): explanation and elaboration. *PLoS Med* **4**(10):e297.
- 476 20. Xie K, Chen CH, Tsai SP, Lu PJ, Wu H, Zeng Y, Ye Y, Tu H, Wen C, Huang M, Zhang Y, Lee JH,  
477 Tsai MK, Wen CP, Wu X 2019 Loss of Life Expectancy by 10 Years or More From Elevated Aspartate  
478 Aminotransferase: Finding Aspartate Aminotransferase a Better Mortality Predictor for All-Cause and  
479 Liver-Related than Alanine Aminotransferase. *Am J Gastroenterol* **114**(9):1478-1487.
- 480 21. Robles-Diaz M, Garcia-Cortes M, Medina-Caliz I, Gonzalez-Jimenez A, Gonzalez-Grande R,  
481 Navarro JM, Castiella A, Zapata EM, Romero-Gomez M, Blanco S, Soriano G, Hidalgo R, Ortega-Torres  
482 M, Clavijo E, Bermudez-Ruiz PM, Lucena MI, Andrade RJ 2015 The value of serum aspartate  
483 aminotransferase and gamma-glutamyl transpeptidase as biomarkers in hepatotoxicity. *Liver Int*  
484 **35**(11):2474-82.
- 485 22. Yu L, Yang M, Cheng M, Fan L, Wang X, Xu T, Wang B, Chen W 2021 Associations between  
486 urinary phthalate metabolite concentrations and markers of liver injury in the US adult population.  
487 *Environ Int* **155**:106608.
- 488 23. Ma X, Fisher JA, VoPham T, Vasiliou V, Jones RR 2023 Associations between per- and  
489 polyfluoroalkyl substances, liver function, and daily alcohol consumption in a sample of U.S. adults.  
490 *Environ Res* **235**:116651.
- 491 24. Johnson CL, Paulose-Ram R, Ogden CL, Carroll MD, Kruszon-Moran D, Dohrmann SM, Curtin  
492 LR 2013 National health and nutrition examination survey: analytic guidelines, 1999-2010. *Vital Health*  
493 *Stat 2* (161):1-24.

- 494 25. Altman DG, Bland JM 2003 Interaction revisited: the difference between two estimates. *BMJ*  
495 **326**(7382):219.
- 496 26. Calafat AM, Kuklenyik Z, Reidy JA, Caudill SP, Ekong J, Needham LL 2005 Urinary  
497 concentrations of bisphenol A and 4-nonylphenol in a human reference population. *Environ Health*  
498 *Perspect* **113**(4):391-5.
- 499 27. Vasiljevic T, Harner T 2021 Bisphenol A and its analogues in outdoor and indoor air: Properties,  
500 sources and global levels. *Sci Total Environ* **789**:148013.
- 501 28. Lakind JS, Naiman DQ 2008 Bisphenol A (BPA) daily intakes in the United States: estimates from  
502 the 2003-2004 NHANES urinary BPA data. *J Expo Sci Environ Epidemiol* **18**(6):608-15.
- 503 29. An SJ, Yang EJ, Oh S, Park KJ, Kim T, Hong YP, Yang YJ 2021 The association between urinary  
504 bisphenol A levels and nonalcoholic fatty liver disease in Korean adults: Korean National  
505 Environmental Health Survey (KoNEHS) 2015-2017. *Environ Health Prev Med* **26**(1):91.
- 506 30. Fang J, Yin H, Yang Z, Tan M, Wang F, Chen K, Zuo Z, Shu G, Cui H, Ouyang P, Guo H, Chen Z,  
507 Huang C, Geng Y, Liu W 2021 Vitamin E protects against cadmium-induced sub-chronic liver injury  
508 associated with the inhibition of oxidative stress and activation of Nrf2 pathway. *Ecotoxicol Environ*  
509 *Saf* **208**:111610.
- 510 31. Marmugi A, Ducheix S, Lasserre F, Polizzi A, Paris A, Priymenko N, Bertrand-Michel J, Pineau T,  
511 Guillou H, Martin PG, Mselli-Lakhal L 2012 Low doses of bisphenol A induce gene expression related to  
512 lipid synthesis and trigger triglyceride accumulation in adult mouse liver. *Hepatology* **55**(2):395-407.
- 513 32. Bindhumol V, Chitra KC, Mathur PP 2003 Bisphenol A induces reactive oxygen species generation  
514 in the liver of male rats. *Toxicology* **188**(2-3):117-24.
- 515 33. Fang R, Yang S, Gu X, Li C, Bi N, Wang HL 2022 Early-life exposure to bisphenol A induces  
516 dysregulation of lipid homeostasis by the upregulation of SCD1 in male mice. *Environ Pollut*  
517 **304**:119201.
- 518 34. Boucher JG, Gagne R, Rowan-Carroll A, Boudreau A, Yauk CL, Atlas E 2016 Bisphenol A and  
519 Bisphenol S Induce Distinct Transcriptional Profiles in Differentiating Human Primary Preadipocytes.  
520 *PLoS One* **11**(9):e0163318.
- 521 35. Bijani M, Dehghan A, Razavi S, Karimi S 2022 Examining the association between opium use,  
522 cigarette smoking and alcohol consumption with the liver enzyme levels in a population-based study:  
523 Fasa Persian cohort data. *BMC Res Notes* **15**(1):2.
- 524 36. Barouki R, Samson M, Blanc EB, Colombo M, Zucman-Rossi J, Lazaridis KN, Miller GW,  
525 Coumoul X 2023 The exposome and liver disease - how environmental factors affect liver health. *J*  
526 *Hepatol* **79**(2):492-505.
- 527 37. Chu S, Sun R, Gu X, Chen L, Liu M, Guo H, Ju S, Vatsalya V, Feng W, McClain CJ, Deng Z 2021

- 528 Inhibition of Sphingosine-1-Phosphate-Induced Th17 Cells Ameliorates Alcohol-Associated  
529 Steatohepatitis in Mice. *Hepatology* **73**(3):952-967.
- 530 38. Chen X, Zhang Z, Cui B, Jiang A, Tao H, Cheng S, Liu Y 2020 Combination of Chronic Alcohol  
531 Consumption and High-Salt Intake Elicits Gut Microbial Alterations and Liver Steatosis in Mice. *J*  
532 *Agric Food Chem* **68**(6):1750-1759.
- 533 39. Andresen-Streichert H, Muller A, Glahn A, Skopp G, Sterneck M 2018 Alcohol Biomarkers in  
534 Clinical and Forensic Contexts. *Dtsch Arztebl Int* **115**(18):309-315.
- 535 40. Gan L, Chitturi S, Farrell GC 2011 Mechanisms and implications of age-related changes in the liver:  
536 nonalcoholic Fatty liver disease in the elderly. *Curr Gerontol Geriatr Res* **2011**:831536.
- 537 41. Schmucker DL 2005 Age-related changes in liver structure and function: Implications for disease ?  
538 *Exp Gerontol* **40**(8-9):650-9.
- 539 42. Dufour DR, Lott JA, Nolte FS, Gretch DR, Koff RS, Seeff LB 2000 Diagnosis and monitoring of  
540 hepatic injury. II. Recommendations for use of laboratory tests in screening, diagnosis, and monitoring.  
541 *Clin Chem* **46**(12):2050-68.
- 542 43. Eslam M, Sanyal AJ, George J 2020 MAFLD: A Consensus-Driven Proposed Nomenclature for  
543 Metabolic Associated Fatty Liver Disease. *Gastroenterology* **158**(7):1999-2014.e1.

544

545

546

547

548

549

550

551

552

553

554

555

556

557

558

559

560

561

562 **Table 1. Survey-weighted, characteristics of the participants included in the NHANES**  
563 **2003-2016 (N=11,750).**

564

| Variables                  | Total (n=11750)      |
|----------------------------|----------------------|
| Age                        | 43.9 (30.4, 57.9)    |
| Sex                        |                      |
| Men                        | 5816 (49.5)          |
| Women                      | 5934 (50.5)          |
| BMI (kg/m <sup>2</sup> )   | 27.69 (23.99, 32.29) |
| Race/ethnicity             |                      |
| Mexican American           | 1978 (8.4)           |
| Other Hispanic             | 1037 (5.3)           |
| Non-Hispanic White         | 4994 (67.2)          |
| Non-Hispanic Black         | 2677 (12.2)          |
| Other Race                 | 1064 (6.9)           |
| Education                  |                      |
| Less than high school      | 1217 (5.6)           |
| High school                | 1894 (12.0)          |
| Some college and more      | 8639 (82.4)          |
| Poverty income ratio (PIR) | 2.82 (1.43, 4.77)    |
| Smoking status             |                      |
| Never                      | 6483 (54.6)          |
| Previous                   | 2672 (23.3)          |
| Current                    | 2595 (22.1)          |
| Alcohol consumption        |                      |
| No                         | 3418 (24.1)          |
| Yes                        | 8332 (75.9)          |
| Hypertension               |                      |
| No                         | 5414 (47.9)          |
| Yes                        | 6336 (52.1)          |
| Diabetes                   |                      |
| No                         | 9766 (86.8)          |
| Yes                        | 1984 (13.2)          |
| Cardiovascular disease     |                      |
| No                         | 10538 (91.7)         |
| Yes                        | 1212 (8.3)           |
| Liver function parameters  |                      |
| ALT (U/L)                  | 20.73 (15.98, 28.57) |
| AST (U/L)                  | 22.59 (19.22, 27.16) |
| ALT/ AST                   | 0.93 (0.77, 1.14)    |
| GGT (U/L)                  | 18.36 (12.90, 28.28) |
| ALP (U/L)                  | 63.23 (52.01, 76.47) |
| TBIL (mg/dL)               | 0.63 (0.47, 0.85)    |
| ALB (g/dL)                 | 4.25 (4.03, 4.47)    |
| TP (g/dL)                  | 7.05 (6.76, 7.35)    |



| Variables         | Total (n=11750)     |
|-------------------|---------------------|
| Creatinine (mg/l) | 11.70 (7.10, 17.38) |

565

566

Note: Data are presented as median (IQR) or N (%); sampling weights were applied for

567

calculation of demographic characteristics; N reflect the study sample while percentages reflect

568

the survey-weighted. ALT: Alanine aminotransferase; AST: Aspartate aminotransferase; GGT:

569

Gamma glutamyl transferase; ALP: Alkaline phosphotase; TBIL: Total bilirubin; ALB: albumin;

570

TP: Total protein.

571

572

573

574

575

576

577

578

579

580

581

582

583

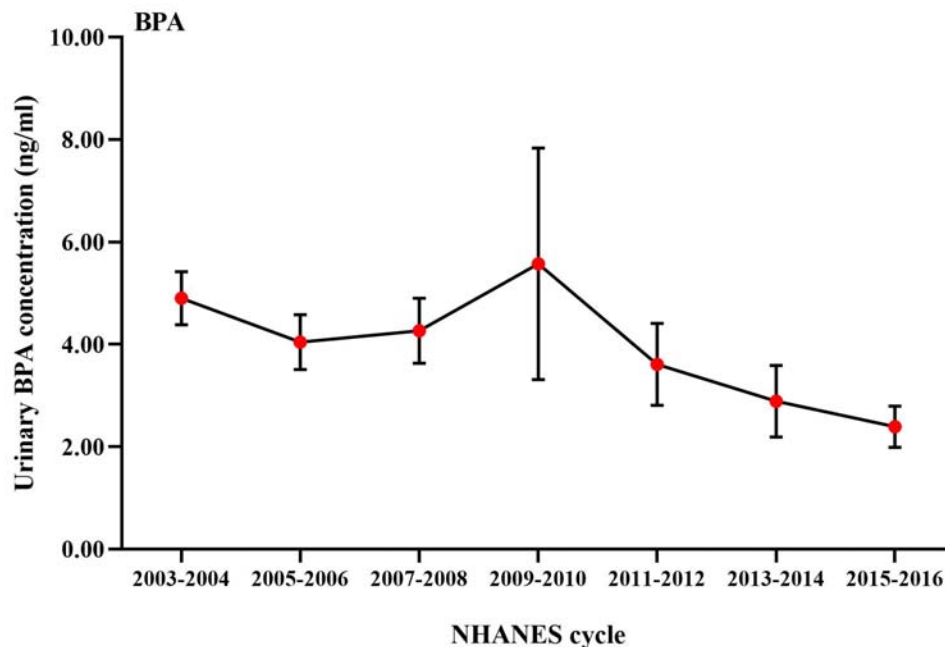

584

585 **Figure 1. Descriptive trend of the urinary bisphenol A concentrations among U.S. adults**

586 **from 2003 to 2016.**

587 Note: Data are presented as mean with 95% confidence interval (95% CI), sampling weights were  
588 applied for calculation of BPA concentrations.

589

590

591

**Table 2. Associations of urinary BPA exposure with eight liver biomarkers among the participants in NHANES 2003-2016.**

| Liver function indicators | Model 1                   |                  | Model 2                   |              | Model 3                   |              |
|---------------------------|---------------------------|------------------|---------------------------|--------------|---------------------------|--------------|
|                           | $\beta$ (95% CI)          | P-value          | $\beta$ (95% CI)          | P-value      | $\beta$ (95% CI)          | P-value      |
| ALT                       | -0.305 (-0.764 to 0.153)  | 0.194            | 0.395 (-0.024 to 0.815)   | 0.067        | 0.388 (-0.026 to 0.803)   | 0.069        |
| AST                       | -0.005 (-0.313 to 0.302)  | 0.973            | 0.294 (-0.011 to 0.600)   | 0.061        | 0.287 (-0.014 to 0.588)   | 0.065        |
| ALT/AST                   | -0.012 (-0.021 to -0.003) | <b>0.011</b>     | 0.004 (-0.004 to 0.011)   | 0.360        | 0.003 (-0.004 to 0.011)   | 0.369        |
| GGT                       | -0.020 (-0.658 to 0.619)  | 0.951            | 0.639 (-0.005 to 1.283)   | 0.054        | 0.594 (-0.041 to 1.228)   | 0.069        |
| ALP                       | 0.731 (0.059 to 1.403)    | <b>0.035</b>     | 0.752 (0.085 to 1.419)    | <b>0.029</b> | 0.729 (0.070 to 1.389)    | <b>0.032</b> |
| TBIL                      | 0.001 (-0.009 to 0.010)   | 0.902            | 0.014 (0.005 to 0.023)    | <b>0.003</b> | 0.014 (0.005 to 0.023)    | <b>0.003</b> |
| ALB                       | -0.025 (-0.035 to -0.015) | <b>&lt;0.001</b> | -0.012 (-0.020 to -0.003) | <b>0.008</b> | -0.011 (-0.020 to -0.003) | <b>0.009</b> |
| TP                        | -0.013 (-0.025 to -0.001) | <b>0.046</b>     | 0.003 (-0.009 to 0.015)   | 0.624        | 0.003 (-0.009 to 0.014)   | 0.649        |

Note: the bold value indicated statistically significant. The estimates was obtained from per unit increment in natural logarithm-transform BPA/Cr).

Model 1: crude model;

Model 2: adjusted for age, sex, BMI, educational level, race/ethnicity, PIR, smoking status, and alcohol consumption;

Model 3: further adjusted for hypertension, diabetes, and cardiovascular disease.

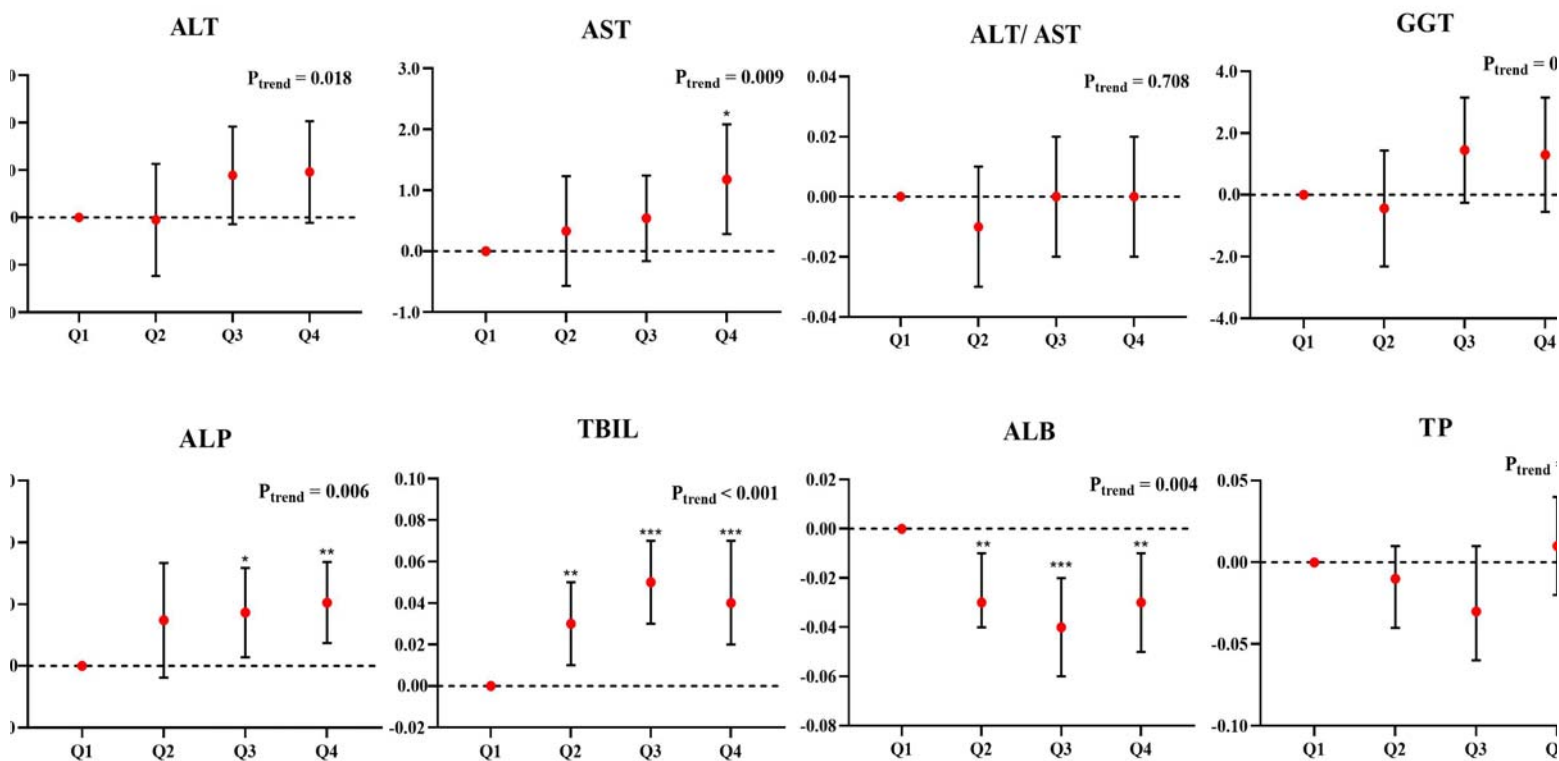

Figure 2. Adjusted associations of urinary BPA exposure with liver function parameters of all the participants, stratified by ln(BPA/Cr) quartiles, adjusted for age, sex, BMI, educational level, race/ethnicity, PIR, smoking status, alcohol consumption, hypertension, diabetes, and cancer. \*  $P < 0.05$ , \*\*  $P < 0.01$ , \*\*\*  $P < 0.001$ .

**i. By smoking**

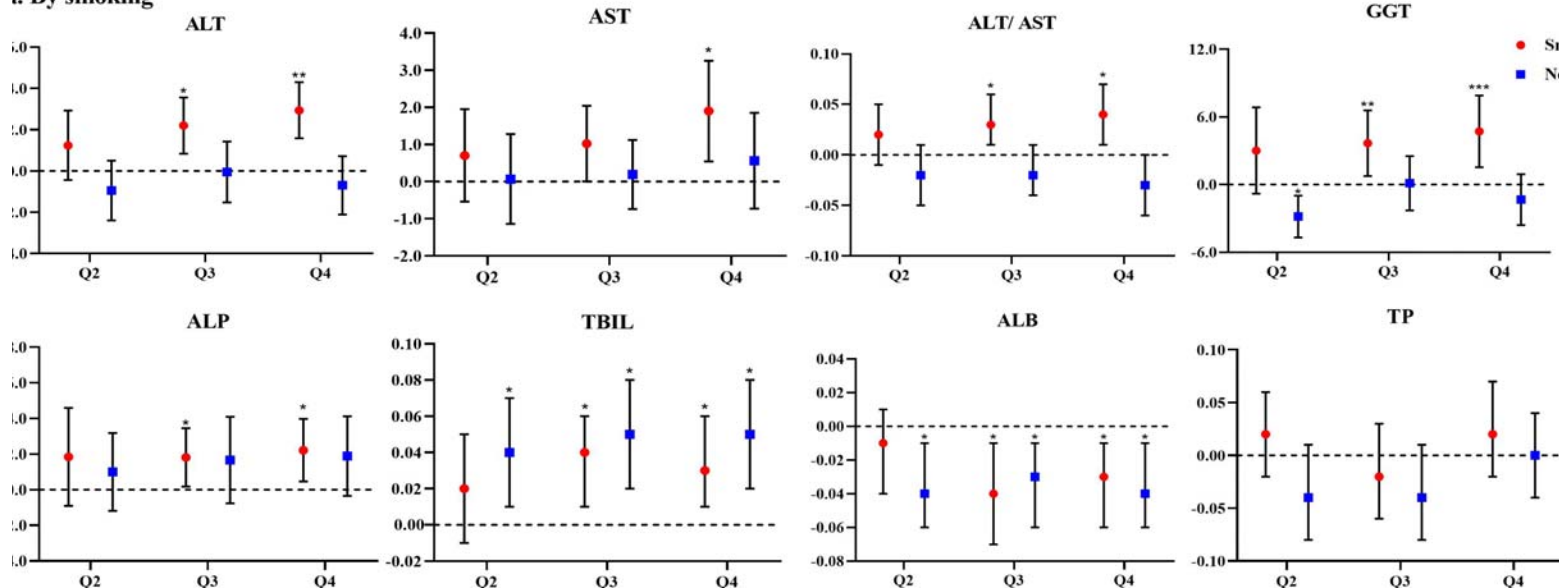

**j. By alcohol drinking**

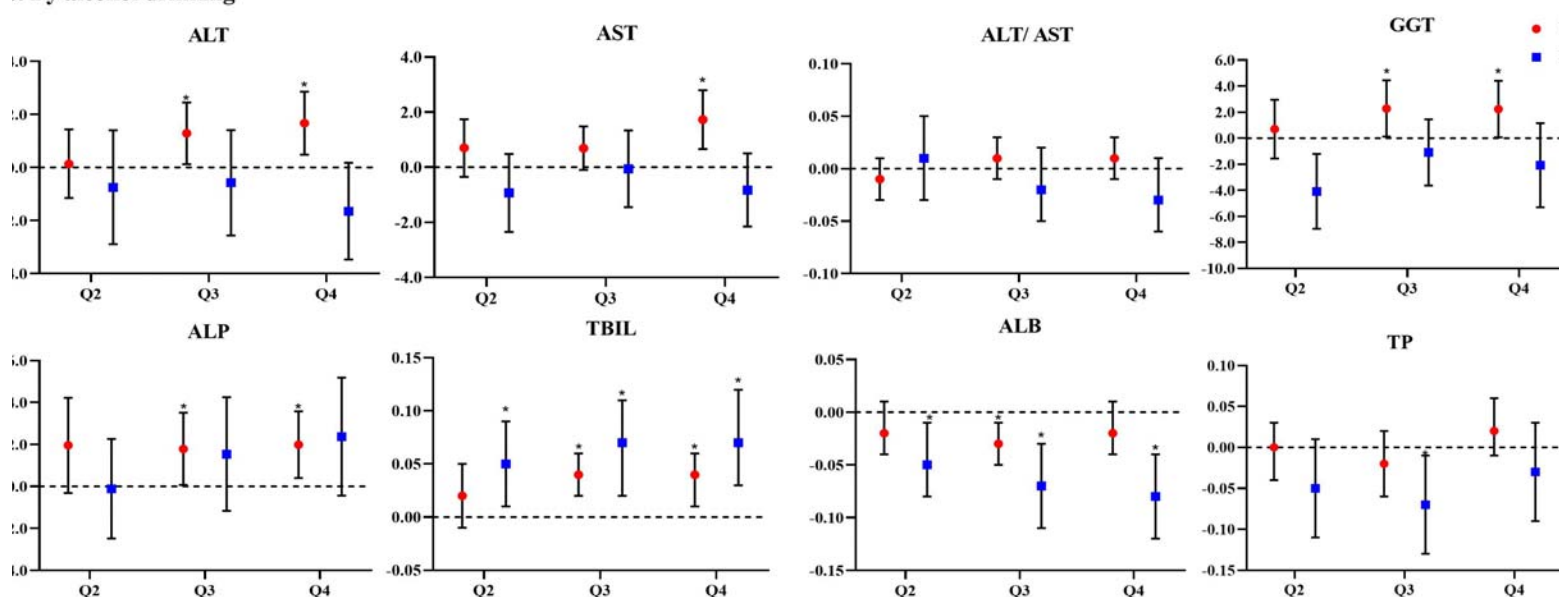

**3. Adjusted associations of urinary BPA with changes in liver function indicators stratified by smoking or alcohol drinking.**

Model adjusted for age, sex, BMI, educational level, race/ethnicity, PIR, smoking status, alcohol consumption, hypertension, diabetes, and cardiovascular disease except for the stratified variable.

Alanine aminotransferase; AST: Aspartate aminotransferase; GGT: Gamma glutamyl transferase; AP: Alkaline phosphatase; TB: Total bilirubin; TP: Total protein. All the analyses conducted by using the lowest quartile as a reference.

5, \*\*  $P < 0.01$ , \*\*\*  $P < 0.001$
